# Supplementary material for: Predicting stillbirth in a low resource setting
Source: PubMed Central journal article supplement (PMC5029011; doi:10.1186/s12884-016-1061-2), 2016-09-20
Supplement: 12884_2016_1061_MOESM1_ESM.pdf [file 12884_2016_1061_MOESM1_ESM.pdf]

Additional file 1: Table S1

---

| Maternal characteristics             | Number [%]   |
|--------------------------------------|--------------|
| Number of previous fetal loss        |              |
| 0                                    | 5,090 [74.5] |
| 1                                    | 1,207 [17.7] |
| 2                                    | 393 [5.7]    |
| 3 or more                            | 143 [2.1]    |
| Number of previous caesarean section |              |
| 0                                    | 5,914 [93.5] |
| 1                                    | 340 [5.4]    |
| 2                                    | 63 [1.0]     |
| 3                                    | 10 [0.1]     |
| Parity                               |              |
| 0 (Nulliparous)                      | 2,051 [30.0] |
| 1                                    | 1,339 [19.6] |
| 2                                    | 1,126 [16.5] |
| 3                                    | 864 [12.6]   |
| 4                                    | 630 [9.2]    |
| 5 or more                            | 836 [12.1]   |
| Number of maternal comorbidity       |              |
| 0                                    | 5,287 [77.2] |
| 1                                    | 1,475 [21.5] |
| 2                                    | 87 [1.3]     |
| 3                                    | 2 [0]        |

---
